# Supplementary material for: Multisite Study of an Evidence-Based Practice to Reduce Seclusion and Restraint in Psychiatric Inpatient Facilities
Source: Atypon-hosted journal article supplement (doi:10.1176/appi.ps.201300210), 2013-12-02
Supplement: 345_ds001.pdf [file 345_ds001.pdf]

| <b>Characteristics of Facilities (N=43)</b> |    |    |
|---------------------------------------------|----|----|
| Characteristic                              | N  | %  |
| <b>Type</b>                                 |    |    |
| Free Standing Psychiatric Facility          | 34 | 79 |
| Residential Program                         | 3  | 7  |
| Other                                       | 6  | 14 |
| <b>Size</b>                                 |    |    |
| 0-50 Beds                                   | 9  | 21 |
| 51-100 Beds                                 | 12 | 28 |
| 101-200 Beds                                | 12 | 28 |
| Over 200 Beds                               | 10 | 23 |
| <b>Patient Population</b>                   |    |    |
| Adult Only                                  | 31 | 72 |
| Children and Adolescents (C/A) Only         | 4  | 9  |
| Mixed Populations (Both Adults & C/A)       | 8  | 19 |
| <b>Security Level</b>                       |    |    |
| Low (Campus or Minimum Level)               | 27 | 63 |
| High (Medium or Maximum Level)              | 16 | 37 |
| <b>Ownership</b>                            |    |    |
| State                                       | 41 | 95 |
| Private: State Contracted                   | 2  | 5  |

**Number and percent of facilities (N=43) having patient population characteristics that are related to seclusion and restraint rates**

| <b>Consumer Characteristics</b>         | <b>Facilities (N)</b> | <b>Facilities (%)</b> | <b>Percent average</b> | <b>Percent range</b> |
|-----------------------------------------|-----------------------|-----------------------|------------------------|----------------------|
| <b>Age</b>                              |                       |                       |                        |                      |
| Age 0-17                                | 16                    | 37                    | 12                     | 0 - 98               |
| Age >65                                 | 39                    | 90                    | 3                      | 0 - 14               |
| <b>Gender</b>                           |                       |                       |                        |                      |
| Male                                    | 43                    | 100                   | 69                     | 54- 100              |
| <b>Race/Ethnicity</b>                   |                       |                       |                        |                      |
| Black/African American                  | 43                    | 100                   | 33                     | 2 - 82               |
| Hispanic                                | 40                    | 93                    | 5                      | 0 - 18               |
| <b>Diagnosis</b>                        |                       |                       |                        |                      |
| Mood Disorders                          | 41                    | 95                    | 28                     | 0- 79                |
| Schizophrenia/other Psychotic Disorders | 41                    | 95                    | 44                     | 0- 92                |
| Substance Use Diagnosis                 | 41                    | 95                    | 40                     | 0 - 69               |
| Involuntary admission                   | 43                    | 100                   | 68                     | 3- 100               |

**Number and percent of facilities having at least one unit with mission and specialty type by implementation category**

|                            | Total<br>(N=43) <sup>1</sup> |     | Facility<br>Stabilized<br>Implementation<br>(N=28) |     | Facility<br>Continued<br>Implementation<br>(N=7) |     | Facility<br>Decreased<br>Implementation<br>(N=5) |    | Facility<br>Discontinued<br>Implementation<br>(N=1) |    | Facility<br>Never<br>Implemented<br>(N=2) |    |
|----------------------------|------------------------------|-----|----------------------------------------------------|-----|--------------------------------------------------|-----|--------------------------------------------------|----|-----------------------------------------------------|----|-------------------------------------------|----|
|                            | N                            | %   | N                                                  | %   | N                                                | %   | N                                                | %  | N                                                   | %  | N                                         | %  |
| <b>Unit Mission</b>        |                              |     |                                                    |     |                                                  |     |                                                  |    |                                                     |    |                                           |    |
| Adult acute                | 21                           | 100 | 14                                                 | 65  | 4                                                | 20  | 2                                                | 10 | 1                                                   | 5  | 0                                         | 0  |
| Adult continuing           | 20                           | 100 | 11                                                 | 55  | 5                                                | 25  | 1                                                | 5  | 1                                                   | 5  | 2                                         | 10 |
| Adult continuing and acute | 24                           | 100 | 19                                                 | 79  | 3                                                | 12  | 1                                                | 4  | 0                                                   | 0  | 1                                         | 4  |
| Child acute                | 3                            | 100 | 2                                                  | 67  | 1                                                | 33  | 0                                                | 0  | 0                                                   | 0  | 0                                         | 0  |
| Child continuing           | 1                            | 100 | 1                                                  | 100 | 0                                                | 0   | 0                                                | 0  | 0                                                   | 0  | 0                                         | 0  |
| Child continuing and acute | 4                            | 100 | 4                                                  | 100 | 0                                                | 0   | 0                                                | 0  | 0                                                   | 0  | 0                                         | 0  |
| Child residential          | 4                            | 100 | 1                                                  | 25  | 1                                                | 25  | 2                                                | 50 | 0                                                   | 0  | 0                                         | 0  |
| Adult Residential          | 1                            | 100 | 0                                                  | 0   | 1                                                | 100 | 0                                                | 0  | 0                                                   | 0  | 0                                         | 0  |
| <b>Unit Specialty</b>      |                              |     |                                                    |     |                                                  |     |                                                  |    |                                                     |    |                                           |    |
| General                    | 37                           | 100 | 23                                                 | 62  | 6                                                | 16  | 5                                                | 13 | 1                                                   | 3  | 2                                         | 5  |
| Forensic                   | 15                           | 100 | 12                                                 | 80  | 3                                                | 20  | 0                                                | 0  | 0                                                   | 0  | 0                                         | 0  |
| Deaf/Blind                 | 2                            | 100 | 2                                                  | 100 | 0                                                | 0   | 0                                                | 0  | 0                                                   | 0  | 0                                         | 0  |
| Developmental Disorders    | 4                            | 100 | 3                                                  | 75  | 1                                                | 25  | 0                                                | 0  | 0                                                   | 0  | 0                                         | 0  |
| Medical                    | 4                            | 100 | 1                                                  | 25  | 2                                                | 50  | 0                                                | 0  | 1                                                   | 25 | 0                                         | 0  |
| Alcohol/Drug               | 3                            | 100 | 3                                                  | 100 | 0                                                | 0   | 0                                                | 0  | 0                                                   | 0  | 0                                         | 0  |
| Geriatric                  | 9                            | 100 | 6                                                  | 66  | 3                                                | 33  | 0                                                | 0  | 0                                                   | 0  | 0                                         | 0  |

1. Column totals exceed total number of facilities because some facilities have multiple units with different missions and specialties.

Change in percent of consumers restrained and secluded and in hours of seclusion and restraint in relation to technical assistance received and facility sub-type (check marks indicate  $p \leq .05$ )

|                                   | Percent consumers secluded | Mean Seclusion Duration | Percent consumers restrained | Mean restraint duration |
|-----------------------------------|----------------------------|-------------------------|------------------------------|-------------------------|
| <b>Site Visits</b>                |                            | ✓                       |                              |                         |
| 0                                 | ✓                          |                         | ✓                            | ✓                       |
| 1                                 |                            |                         |                              |                         |
| 2                                 |                            |                         |                              |                         |
| 3                                 |                            |                         |                              |                         |
| 4                                 | ✓                          | ✓                       |                              |                         |
| <b>Remote TA</b>                  |                            |                         |                              |                         |
| 0                                 |                            |                         |                              |                         |
| 1                                 |                            | ✓                       |                              |                         |
| 2                                 |                            |                         |                              |                         |
| 3                                 | ✓                          | ✓                       | ✓                            |                         |
| 4                                 |                            |                         |                              |                         |
| 5                                 |                            |                         |                              |                         |
| <b>Facility Size</b>              |                            |                         |                              |                         |
| <51 Beds                          |                            | ✓                       |                              |                         |
| 51-100 Beds                       | ✓                          | ✓                       | ✓                            | ✓                       |
| 101-200 Beds                      | ✓                          |                         |                              |                         |
| >200 Beds                         |                            | ✓                       |                              |                         |
| <b>Ownership</b>                  |                            |                         |                              |                         |
| State                             | ✓                          | ✓                       | ✓                            |                         |
| Private/Other                     |                            | ✓                       |                              |                         |
| <b>Ages served</b>                |                            |                         |                              |                         |
| Adult Only                        | ✓                          | ✓                       | ✓                            |                         |
| Adult & child                     |                            |                         | ✓                            |                         |
| <b>Unit Specialty<sup>1</sup></b> |                            |                         |                              |                         |
| General                           | ✓                          |                         |                              |                         |
| Acute                             | ✓                          | ✓                       |                              |                         |
| Forensic                          |                            | ✓                       | ✓                            |                         |
| Co-occurring                      |                            |                         |                              |                         |
| GeroPsychiatric                   |                            |                         |                              | ✓                       |
| High Security                     | ✓                          |                         | ✓                            |                         |
| Locked                            | ✓                          | ✓                       | ✓                            |                         |
